# Supplementary material
Source: PubMed Central journal article supplement (PMC4456644)
Supplement: supp_tpc.15.00127_TPC2015-00127-RAR1_Supplemental_Data_pdf.pdf [file supp_tpc.15.00127_TPC2015-00127-RAR1_Supplemental_Data_pdf.pdf]

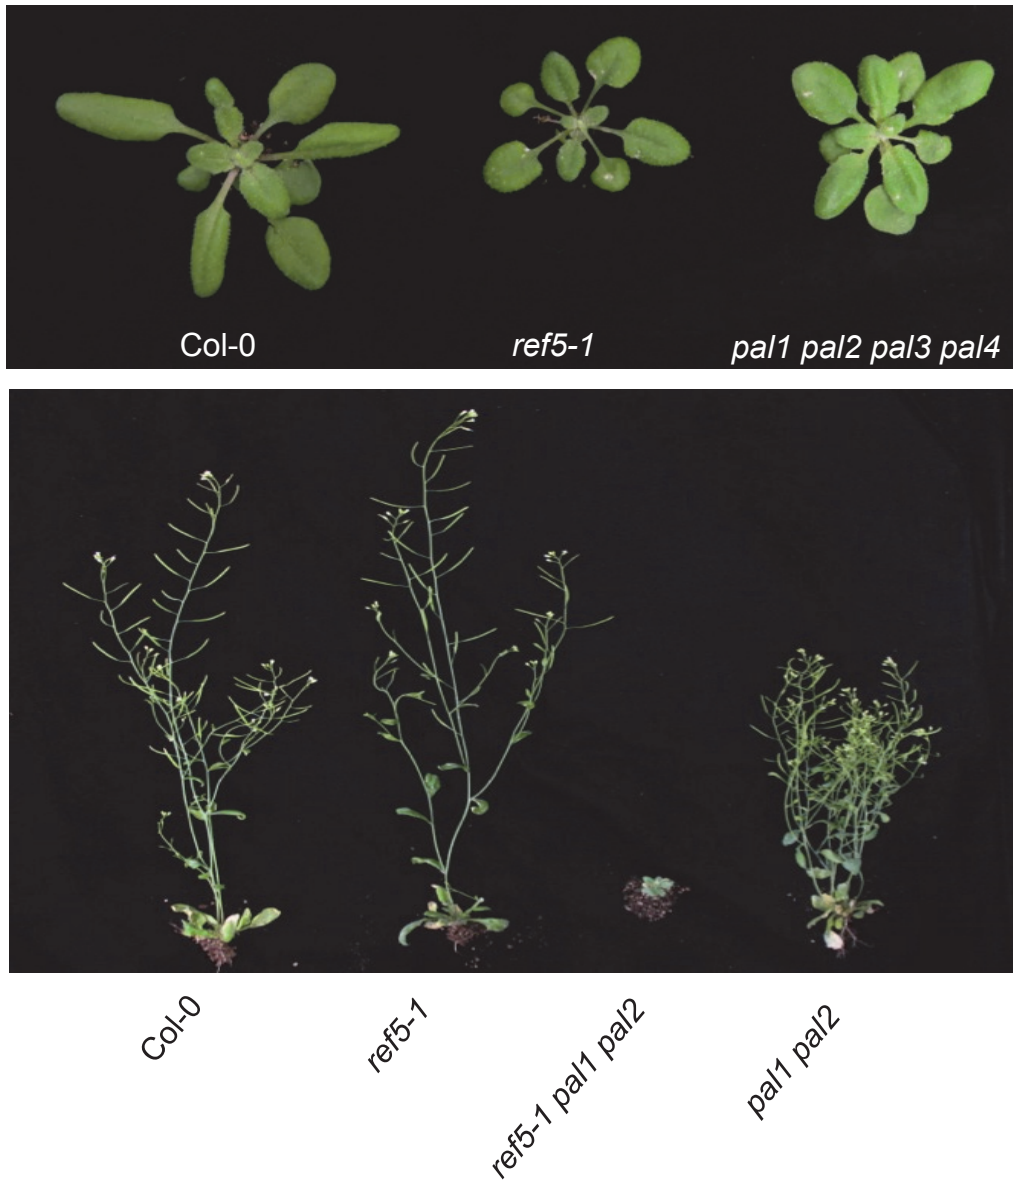

**Supplemental Figure 1.**

Growth phenotype of four-week-old soil grown *pal1 pal2 pal3 pal4* quadruple plant (top) and five-week-old *ref5-1 pal1 pal2* plant (bottom) was compared with *ref5-1*, *pal1 pal2* double mutant and wild type.

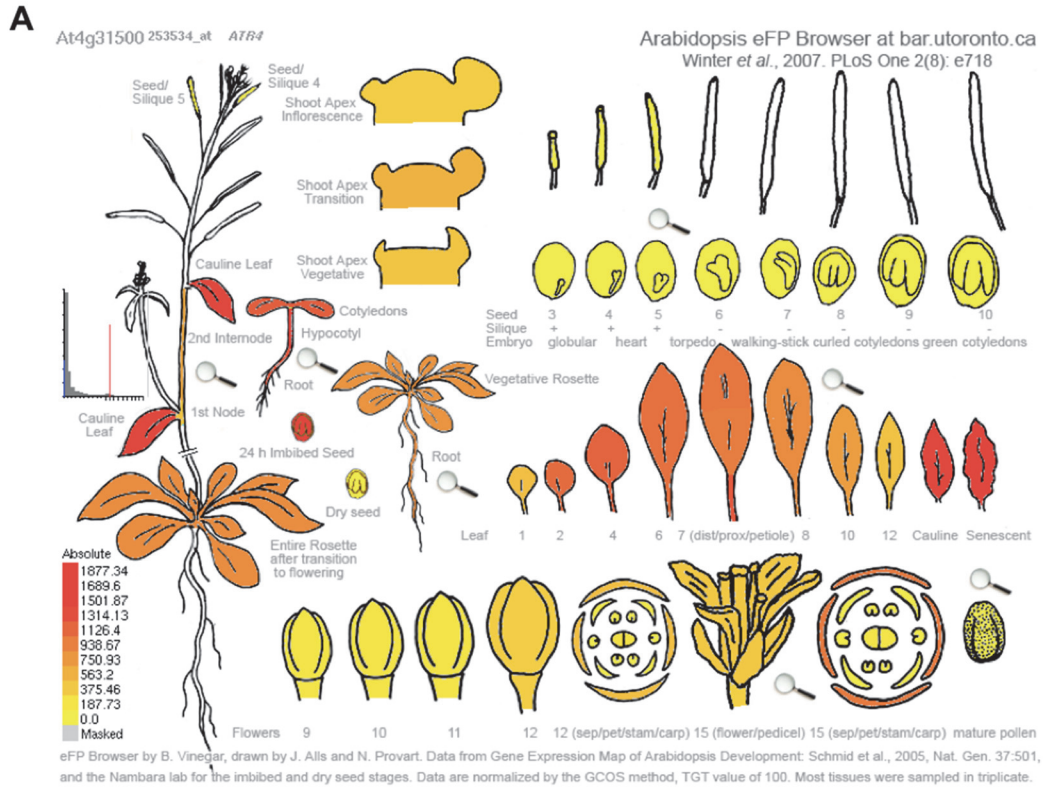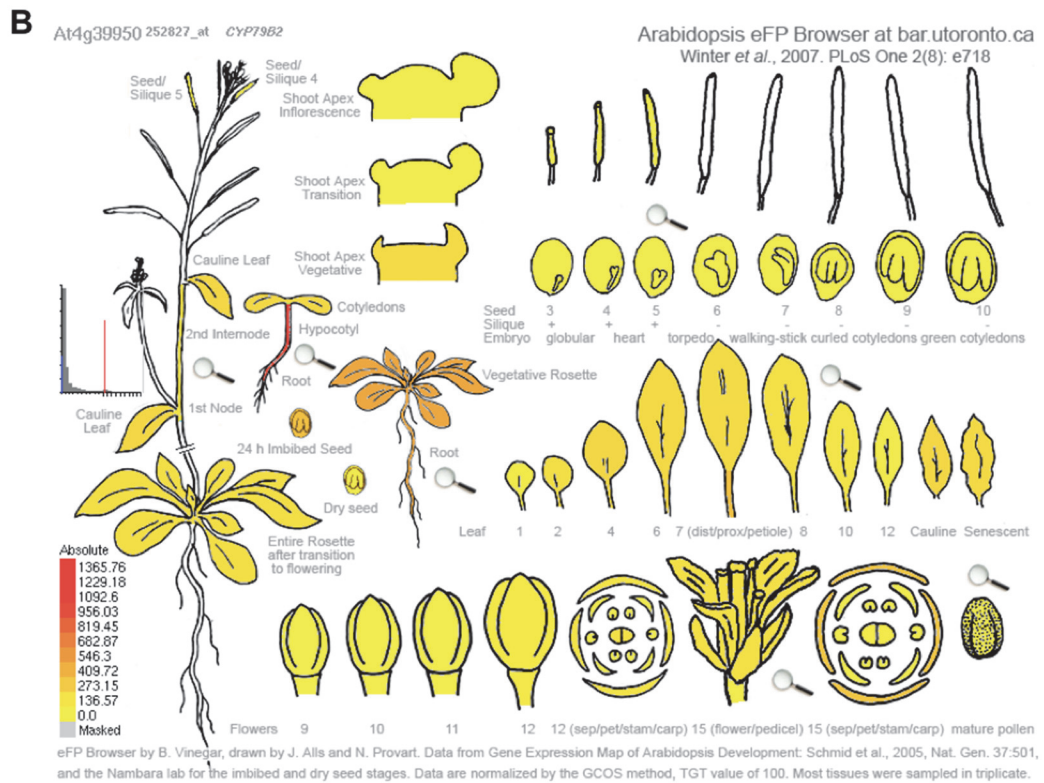

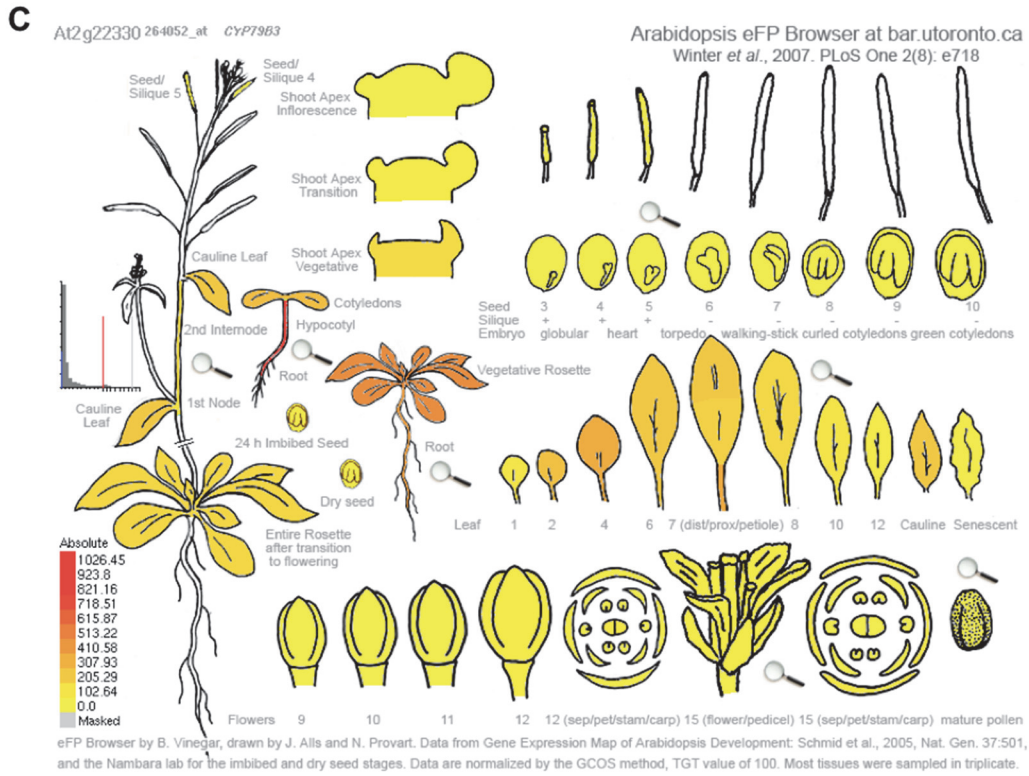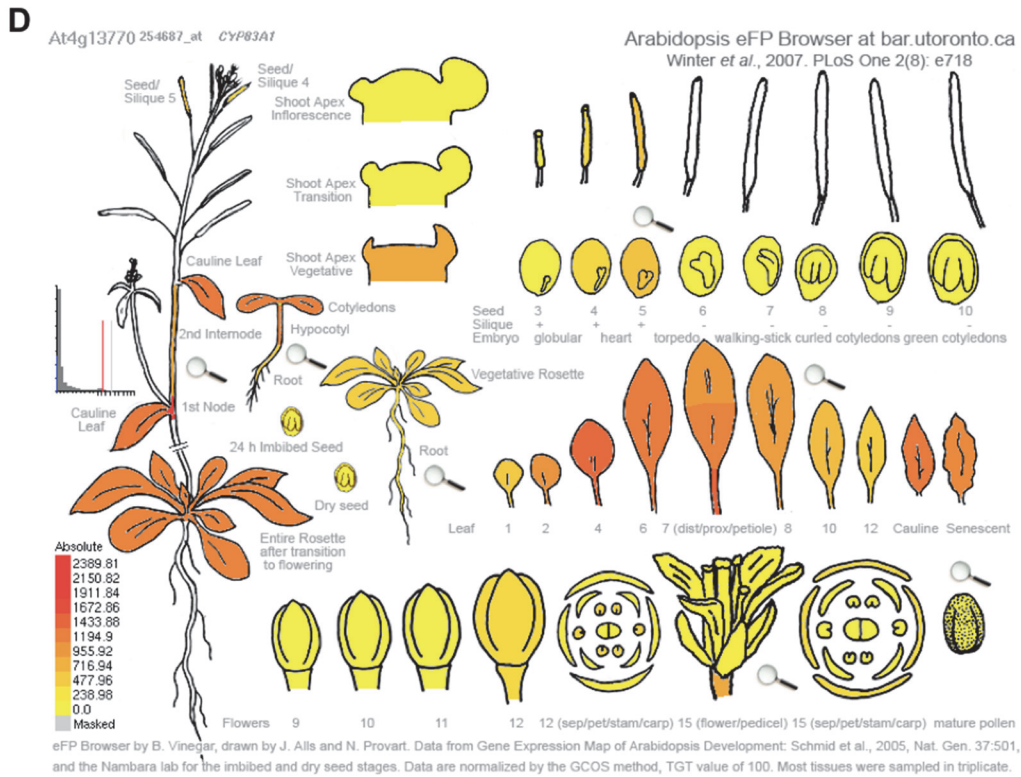



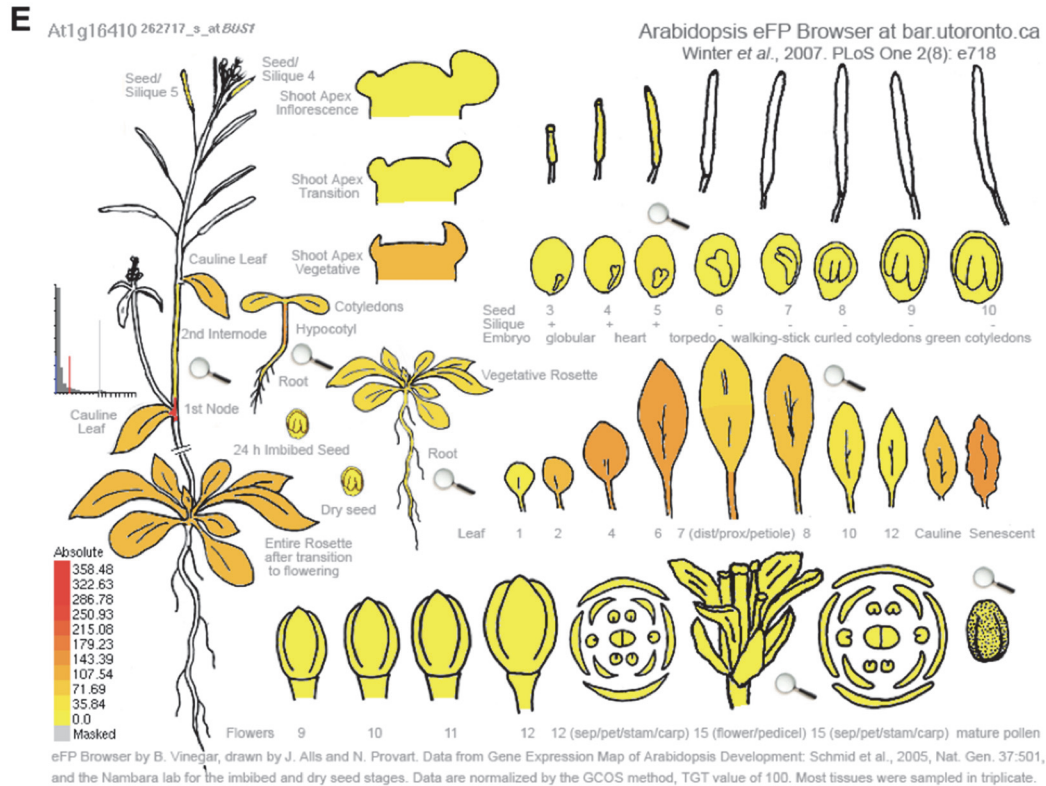

**Supplemental Figure 2.** Expression pattern of *CYP83B1*, *CYP79B2*, *CYP79B3*, *CYP83A1*, and *CYP79F1*.

(A)-(E) The spatial expression pattern of *CYP83B1* (A), *CYP79B2* (B), *CYP79B3* (C), *CYP83A1* (D) and *CYP79F1* (E) were obtained from the Arabidopsis eFP Browser at bar.utoronto.ca (Winder et al., 2007).

**Supplemental Table 1.** Primers used in this work.

| Primer | Primer sequence (5' -> 3')                                 |
|--------|------------------------------------------------------------|
| CC1352 | ATCCGAACACAAAGACTTAAG                                      |
| CC1357 | TATTATTCTTCCTAAGCCGG                                       |
| CC1353 | TCACCGCTCGTCCTCTCTTG                                       |
| CC1354 | ATAGATATCTTGTACGAGACGC                                     |
| CC1355 | CTCTAACTTAGTTAAACCTC                                       |
| CC1356 | GACCATCATTGAGTGAACGC                                       |
| CC1358 | CCAGAGGGAATATTAAGGG                                        |
| CC1359 | GAAGGTTAGGAAAGGTATC                                        |
| CC1360 | GCCTTTAGGTAAGGGAGATTAG                                     |
| CC1691 | TCAGGATATTGTTGTGCCGG                                       |
| CC1548 | GTCTCCCACGCGGCTGTGTCTCGA                                   |
| CC3280 | GGAAGCTTTCAAATTAGCAGGAAT                                   |
| CC3281 | GACTAGCGCGAGACCTTCCTTA                                     |
| CC3282 | ACCGGCCGTCCTAATTCC                                         |
| CC3283 | GCTTCTTTCGCGGTTAGCGATTC                                    |
| CC3256 | GCCACTAAGCCTTGCCTAATCA                                     |
| CC3257 | CGTGGACGTCGGAGTAAGTGT                                      |
| CC3258 | TCTCCTCGTGCCTCACA TGA                                      |
| CC3259 | TGCTTTCTGCTGGGATATCGTA                                     |
| CC2558 | TAACGTGGCCAAAATGATGC                                       |
| CC2559 | GTTCTCCACAACCGCTTGGT                                       |
| CC3272 | CTCAAAGAAACCCTAAGGATGCA                                    |
| CC3273 | GTCCTCCGCGGTTTCGT                                          |
| CC2839 | CAAAGGATCAAACGTTTCATGTGA                                   |
| CC2840 | TTCCATACAGCCGGGTCTCT                                       |
| CC2020 | GGTTGGGGTCGTCCTATCTT                                       |
| CC2021 | ACGGATAAGCTGCCATCATT                                       |
| CC3844 | CTCAGGGAAGTGACAGCAA                                        |
| CC3845 | GTGGCGAGAAGAGAGTAGCC                                       |
| CC3813 | CAAGGGCATGGAAAGTCAAC                                       |
| CC3814 | TTGCTGCTACCTCCGACTAC                                       |
| CC3582 | GGGGACAAGTTTGTACAAAAAAGCAGGCTTCATGAACAC<br>TTTTACCTCAAAC   |
| CC3583 | GGGGACCACTTTGTACAAGAAAGCTGGGTTTTACTTCAC<br>CGTCGGGTAGAGATG |
| CC3663 | CTCGCGAGACTTCTTCAAGG                                       |
| CC3664 | CCATAACCAACGGTTTAGCC                                       |
| CC3405 | AGAACTCTTGACCCTAACCGC                                      |
| CC3406 | GCGAGTCCAGTCATGACGTCC                                      |
| CC3407 | GGCAATCAGCTGTTGCCCGTCTCACTGGTG                             |

|        |                         |
|--------|-------------------------|
| CC2016 | TGGTTGACCGAGAGTACGTG    |
| CC2017 | ATCCGCTAAAGCGTGGTCTA    |
| CC4010 | CCACCTTATTTAAACCACCCTTC |
| CC4011 | ATGTGTGGCTTGTTTCTTTTCG  |
| CC2449 | ATTTTGCCGATTTTCGGAAC    |
| CC4061 | CAATGGATCAAATCGAAGCA    |
| CC4062 | TATTCCGGCGTTCAAAAATC    |
| CC2501 | ATATTGACCATCATACTCATTGC |
| CC1770 | AGGTTGCAGTCAAAGGATCG    |
| CC1775 | TCCTGATGAACTGCTTGTGC    |
